# Supplementary material for: Association Mapping for Quantitative Trait Loci Controlling Superoxide Dismutase, Flavonoids, Anthocyanins, Carotenoids, γ-Oryzanol and Antioxidant Activity in Rice
Source: MDPI journal article supplement (doi:10.3390/agronomy12123036), 2022-11-30
Supplement: s1 [file s1]

## Supplementary figures

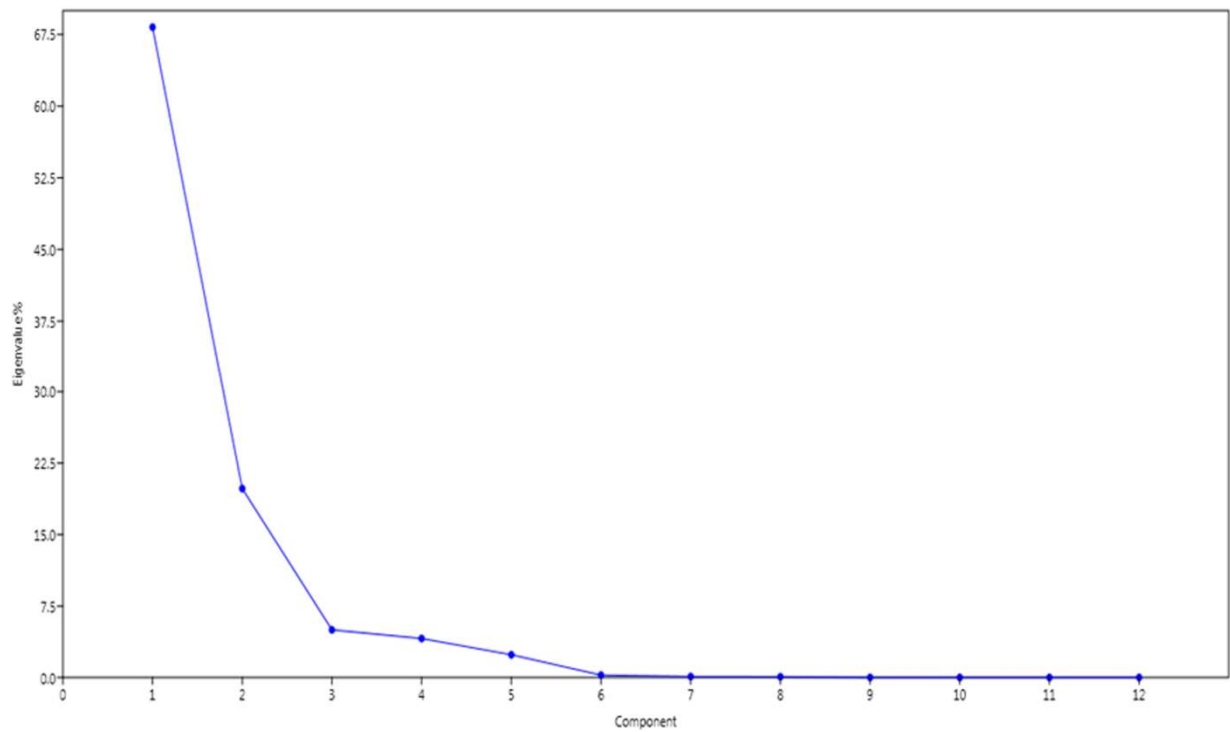

Supplementary figure 1. Scree plot and loadings generated by the six antioxidant traits and eigen values % in the 120 rice germplasm lines.

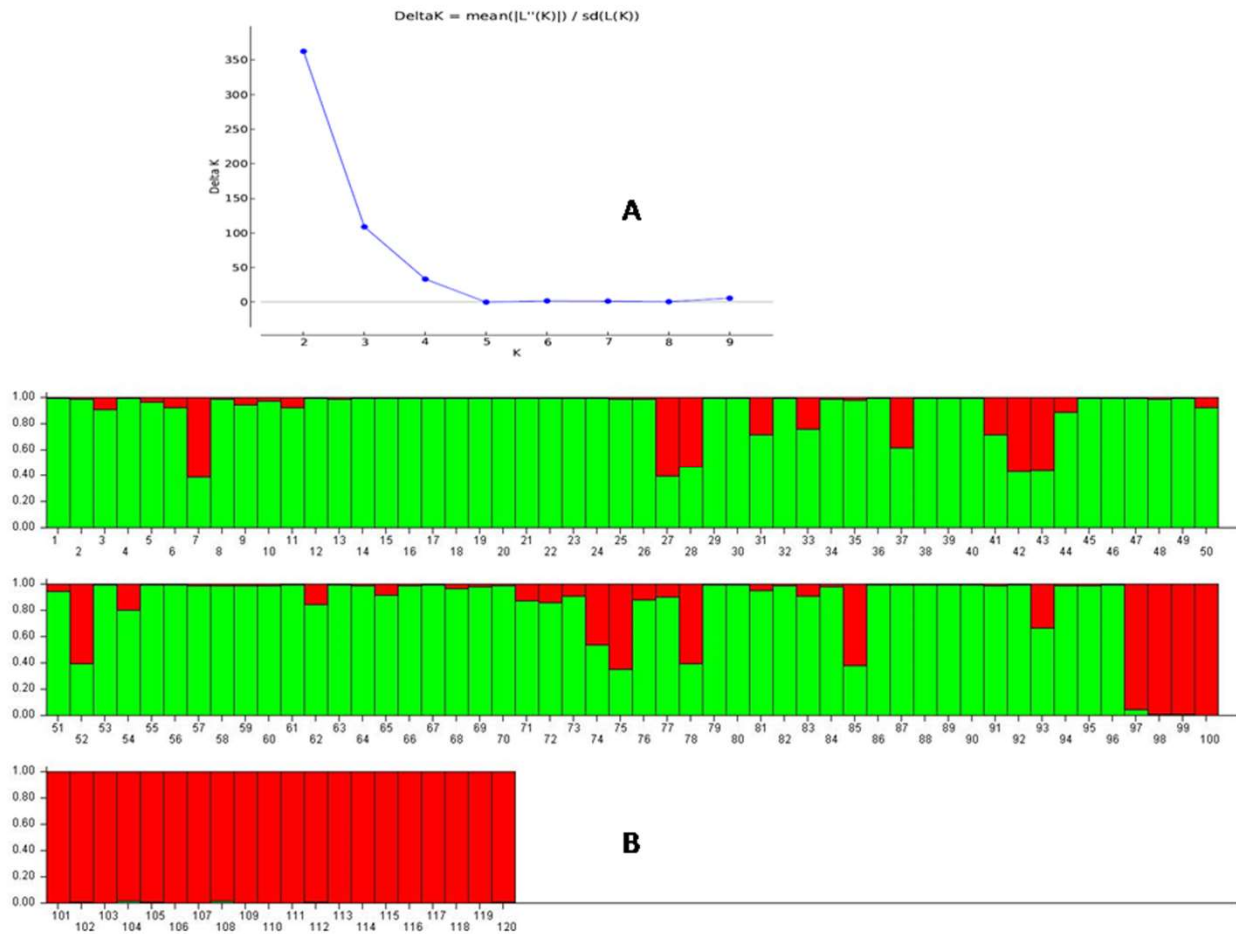

Supplementary Figure 2. A) Graph of  $\Delta K$  value, to the rate of change in the log probability structure of the 120 germplasm lines of the panel population based on membership probability fractions of individual genotypes at K of data between successive K values; B) Population = 2.

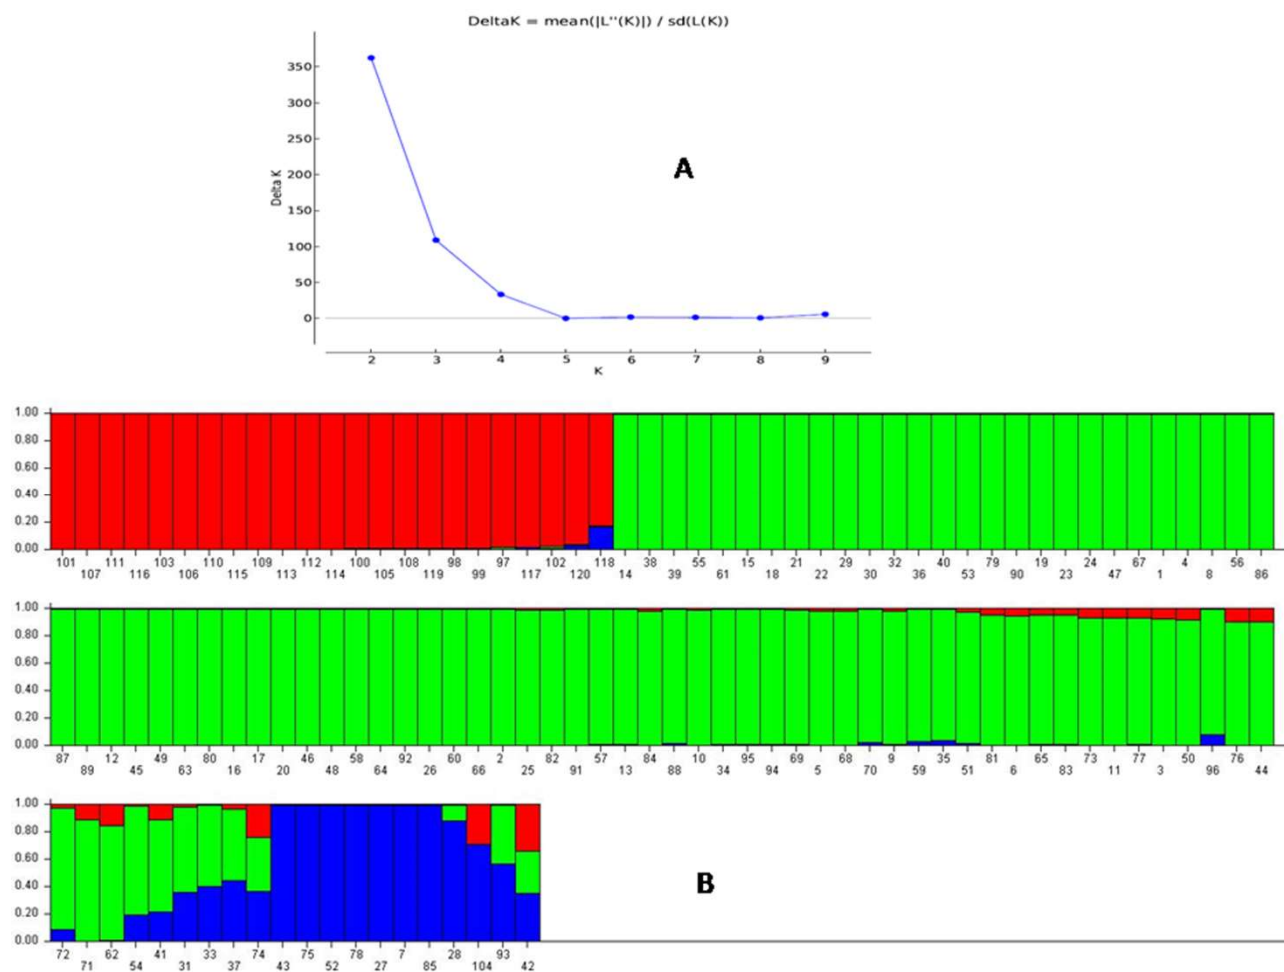

Supplementary Figure 3. A) Graph of  $\Delta K$  value, to the rate of chan structure of the 120 germplasm lines of the panel population based on membership probability fractions ge in the log probability of data between successive K values; of individual genotypes at K B) Population = 3.

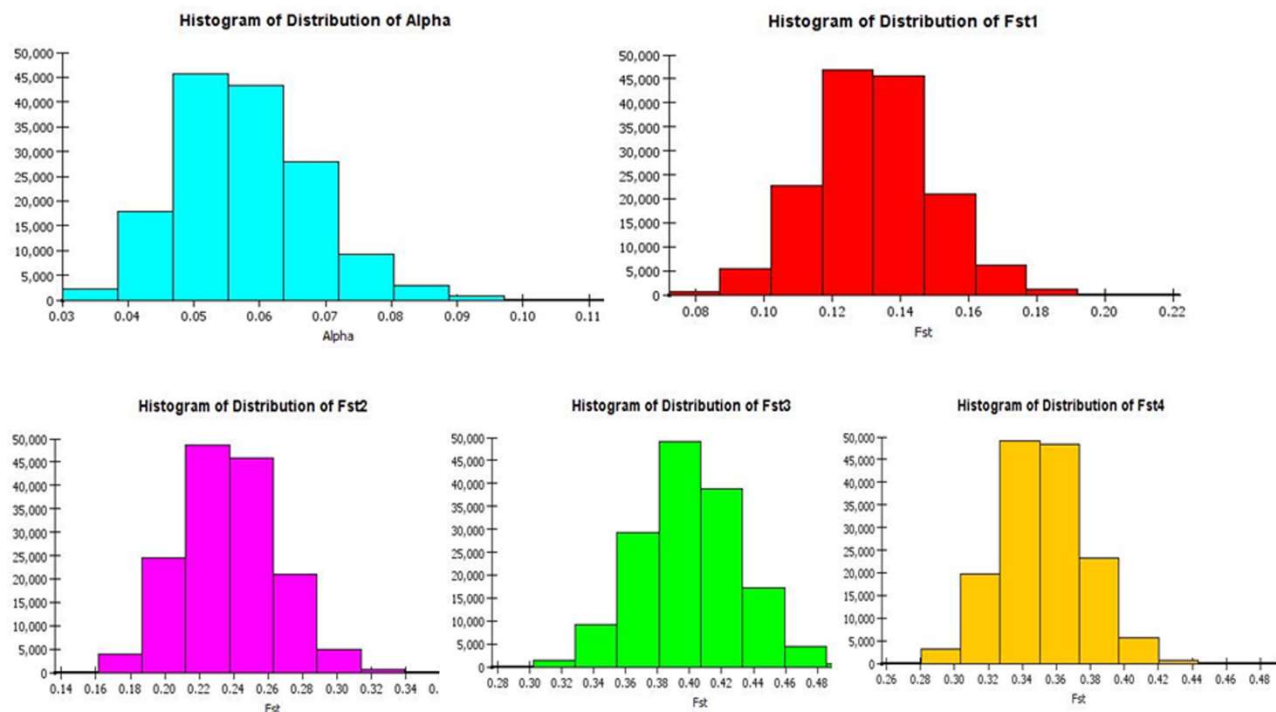

Supplementary Figure 4. The distribution pattern of alpha value and Fst values in the 4 subpopulations at K=4.

Supplementary Table 1. Mean values of carotenoids, SOD, TAC, GO, TFC and ABTS antioxidants in 270 rice germplasm lines

| Sl No. | Kernel colour | Genotype accession no./Vernacular name/ Cultivar | Carotenoids | SOD   | TAC   | GO     | TFC    | ABTS   |
|--------|---------------|--------------------------------------------------|-------------|-------|-------|--------|--------|--------|
| 1      | White         | AC. 9005                                         | 1.612       | 0.268 | 0.126 | 47.375 | 24.333 | 14.622 |
| 2      | White         | AC. 9006                                         | 1.014       | 0.284 | 0.064 | 70.438 | 17.889 | 11.412 |
| 3      | White         | AC. 9021                                         | 0.444       | 0.199 | 0.083 | 76.313 | 22.000 | 11.769 |
| 4      | White         | AC.9030                                          | 0.686       | 0.150 | 0.123 | 39.563 | 18.667 | 11.555 |
| 5      | White         | AC. 9035                                         | 0.262       | 0.196 | 0.117 | 49.500 | 17.667 | 11.698 |
| 6      | White         | AC. 9043                                         | 0.308       | 0.175 | 0.061 | 39.688 | 18.444 | 8.131  |
| 7      | White         | AC. 9044A                                        | 0.713       | 0.221 | 0.048 | 49.938 | 17.556 | 15.906 |
| 8      | White         | AC. 9053A                                        | 0.154       | 0.159 | 0.053 | 42.000 | 17.333 | 9.415  |
| 9      | White         | AC. 9058                                         | 0.573       | 0.126 | 0.055 | 5.313  | 23.222 | 11.698 |
| 10     | White         | AC. 9076A                                        | 0.899       | 0.159 | 0.048 | 43.688 | 22.889 | 12.126 |
| 11     | White         | AC. 9090                                         | 0.255       | 0.221 | 0.079 | 48.438 | 16.667 | 10.556 |
| 12     | White         | AC. 9093                                         | 0.357       | 0.215 | 0.061 | 45.750 | 17.000 | 11.270 |
| 13     | White         | AC. 9102                                         | 0.283       | 0.317 | 0.052 | 61.875 | 15.000 | 11.660 |

|    |       |                      |       |       |       |         |        |        |
|----|-------|----------------------|-------|-------|-------|---------|--------|--------|
| 14 | White | AC. 9119A            | 0.738 | 0.264 | 0.070 | 56.438  | 14.111 | 9.325  |
| 15 | White | AC. 20317            | 0.870 | 0.332 | 0.102 | 79.063  | 23.444 | 10.542 |
| 16 | White | AC. 20328            | 1.331 | 0.312 | 0.078 | 67.500  | 22.000 | 6.076  |
| 17 | White | AC. 20362            | 0.811 | 0.312 | 0.077 | 68.750  | 19.222 | 10.688 |
| 18 | White | AC. 20371            | 0.839 | 0.284 | 0.083 | 110.000 | 32.000 | 6.149  |
| 19 | White | AC. 20389            | 1.247 | 0.279 | 0.035 | 66.250  | 19.333 | 10.102 |
| 20 | White | AC. 20664            | 0.828 | 0.256 | 0.070 | 51.938  | 19.778 | 7.028  |
| 21 | White | AC. 20686            | 0.968 | 0.290 | 0.073 | 43.188  | 21.778 | 4.539  |
| 22 | White | AC. 20845            | 1.257 | 0.265 | 0.102 | 61.250  | 18.889 | 6.442  |
| 23 | White | AC. 20436            | 0.346 | 0.198 | 0.075 | 53.000  | 22.444 | 18.265 |
| 24 | White | AC. 20604            | 0.416 | 0.237 | 0.046 | 49.063  | 24.333 | 12.400 |
| 25 | White | AC. 20690            | 0.683 | 0.292 | 0.064 | 70.875  | 21.556 | 11.890 |
| 26 | white | Karpurkanti          | 1.052 | 0.155 | 0.079 | 44.625  | 18.333 | 12.645 |
| 27 | White | Lata mahu            | 0.493 | 0.189 | 0.141 | 23.375  | 21.444 | 13.584 |
| 28 | White | Chinamal             | 0.748 | 0.300 | 0.111 | 18.313  | 22.222 | 9.104  |
| 29 | White | Magra                | 0.146 | 0.311 | 0.119 | 19.875  | 17.111 | 9.971  |
| 30 | White | Lalgundi             | 0.353 | 0.289 | 0.124 | 10.563  | 22.222 | 11.272 |
| 31 | White | Balisara lakti machi | 0.234 | 0.253 | 0.116 | 18.750  | 39.111 | 11.922 |
| 32 | White | Laxmi bilash         | 0.289 | 0.191 | 0.211 | 40.813  | 18.667 | 12.139 |
| 33 | White | Kanak champa         | 0.129 | 0.272 | 0.159 | 39.313  | 16.444 | 15.795 |
| 34 | White | Magura-s             | 0.210 | 0.295 | 0.134 | 43.063  | 16.000 | 13.512 |
| 35 | White | Maguramanji          | 0.762 | 0.278 | 0.081 | 38.125  | 16.444 | 18.390 |
| 36 | white | Jhagri kartik        | 0.080 | 0.209 | 0.167 | 39.688  | 15.222 | 10.623 |
| 37 | white | Dad ghani            | 0.411 | 0.206 | 0.130 | 51.875  | 16.000 | 12.606 |
| 38 | White | Shayam               | 0.455 | 0.196 | 0.170 | 58.313  | 19.333 | 12.677 |
| 39 | white | Basumati-B           | 0.091 | 0.177 | 0.124 | 55.750  | 20.667 | 15.935 |
| 40 | White | Joha                 | 0.094 | 0.248 | 0.155 | 41.688  | 17.000 | 11.402 |
| 41 | White | Jhingesal            | 0.423 | 0.209 | 0.163 | 39.750  | 19.000 | 13.456 |
| 42 | White | Sugandha-2           | 0.273 | 0.278 | 0.127 | 57.125  | 19.444 | 11.615 |
| 43 | White | Gochi                | 0.098 | 0.323 | 0.118 | 42.000  | 22.000 | 14.731 |
| 44 | White | Uttarbanga local-9   | 0.098 | 0.296 | 0.060 | 51.500  | 18.333 | 15.439 |
| 45 | White | Chatui muchi         | 0.525 | 0.322 | 0.120 | 49.875  | 18.778 | 16.714 |
| 46 | White | Palina dhan-1        | 0.094 | 0.342 | 0.150 | 38.313  | 21.000 | 14.589 |
| 47 | White | Jaya                 | 0.091 | 0.079 | 0.093 | 43.688  | 14.778 | 16.255 |
| 48 | White | Gandhakasala         | 0.066 | 0.250 | 0.129 | 66.750  | 17.000 | 13.353 |
| 49 | White | Gerwathor            | 0.419 | 0.186 | 0.163 | 35.875  | 14.444 | 8.375  |
| 50 | White | Kaikee               | 0.273 | 0.328 | 0.122 | 43.313  | 16.889 | 25.200 |
| 51 | White | Manahar rathori      | 0.655 | 0.185 | 0.147 | 50.688  | 14.778 | 9.465  |

|    |       |           |       |       |       |        |         |        |
|----|-------|-----------|-------|-------|-------|--------|---------|--------|
| 52 | White | Bakuldhan | 0.066 | 0.238 | 0.200 | 45.375 | 25.889  | 16.530 |
| 53 | White | AC. 5993  | 0.115 | 0.239 | 0.209 | 43.750 | 12.333  | 8.853  |
| 54 | White | AC. 6007  | 0.287 | 0.192 | 0.027 | 32.125 | 13.111  | 7.983  |
| 55 | White | AC. 6023  | 0.112 | 0.280 | 0.143 | 33.313 | 13.000  | 10.522 |
| 56 | White | AC. 6027  | 0.133 | 0.175 | 0.141 | 38.188 | 12.333  | 7.983  |
| 57 | White | AC. 6170  | 1.165 | 0.176 | 0.090 | 52.250 | 13.333  | 11.063 |
| 58 | White | AC. 6172  | 0.297 | 0.181 | 0.225 | 34.125 | 13.444  | 7.569  |
| 59 | white | AC. 6183  | 0.182 | 0.015 | 0.102 | 47.125 | 13.889  | 14.119 |
| 60 | White | AC. 6221  | 0.423 | 0.101 | 0.159 | 47.375 | 13.333  | 8.952  |
| 61 | white | AC. 7008  | 0.913 | 0.011 | 0.078 | 42.438 | 22.444  | 9.534  |
| 62 | White | AC. 7134  | 0.418 | 0.144 | 0.118 | 46.438 | 17.333  | 6.841  |
| 63 | White | AC. 7269  | 0.119 | 0.005 | 0.204 | 43.938 | 14.111  | 10.189 |
| 64 | White | AC. 7282  | 0.136 | 0.047 | 0.084 | 37.063 | 20.667  | 10.335 |
| 65 | White | AC. 10187 | 0.395 | 0.159 | 0.085 | 30.063 | 37.111  | 12.981 |
| 66 | White | AC. 10608 | 0.427 | 0.087 | 0.108 | 43.125 | 12.333  | 10.414 |
| 67 | White | AC. 6006  | 0.465 | 0.224 | 0.176 | 35.813 | 13.000  | 11.295 |
| 68 | White | AC. 6617  | 0.091 | 0.050 | 0.154 | 40.563 | 17.112  | 15.389 |
| 69 | White | AC. 7009  | 0.420 | 0.058 | 0.144 | 42.000 | 12.000  | 9.038  |
| 70 | White | AC. 7124  | 0.598 | 0.112 | 0.209 | 36.125 | 26.667  | 18.891 |
| 71 | White | AC. 7204  | 0.119 | 0.160 | 0.167 | 36.313 | 13.222  | 15.827 |
| 72 | White | AC. 10333 | 0.521 | 0.241 | 0.126 | 34.563 | 13.000  | 15.197 |
| 73 | White | AC. 10438 | 0.346 | 0.209 | 0.119 | 43.125 | 13.111  | 14.556 |
| 74 | White | AC. 44597 | 1.735 | 0.075 | 0.116 | 54.875 | 40.654  | 13.015 |
| 75 | White | AC. 44598 | 1.938 | 0.124 | 0.224 | 59.313 | 28.889  | 11.618 |
| 76 | White | AC. 44638 | 0.801 | 0.161 | 0.104 | 77.250 | 55.667  | 9.559  |
| 77 | White | AC. 44603 | 1.098 | 0.227 | 0.110 | 60.875 | 43.889  | 13.088 |
| 78 | White | AC. 44604 | 1.259 | 0.203 | 0.149 | 60.313 | 28.889  | 13.015 |
| 79 | White | AC. 44319 | 1.626 | 0.232 | 0.146 | 48.813 | 24.444  | 23.275 |
| 80 | White | AC. 44586 | 0.720 | 0.030 | 0.087 | 70.563 | 102.064 | 41.544 |
| 81 | White | AC. 44602 | 0.720 | 0.142 | 0.049 | 57.875 | 66.889  | 16.765 |
| 82 | White | AC. 44601 | 0.430 | 0.202 | 0.107 | 50.563 | 72.556  | 11.544 |
| 83 | White | AC. 44608 | 1.273 | 0.141 | 0.105 | 54.625 | 72.444  | 11.618 |
| 84 | White | AC. 44613 | 0.647 | 0.170 | 0.073 | 63.563 | 71.000  | 12.324 |
| 85 | White | AC. 44649 | 0.514 | 0.244 | 0.088 | 58.750 | 74.333  | 13.456 |
| 86 | White | AC. 43660 | 1.197 | 0.292 | 0.220 | 41.250 | 26.778  | 12.955 |
| 87 | White | AC. 43661 | 0.164 | 0.281 | 0.107 | 43.000 | 50.778  | 24.600 |
| 88 | White | AC. 43662 | 0.112 | 0.258 | 0.079 | 36.375 | 66.222  | 13.028 |
| 89 | White | AC. 43663 | 0.154 | 0.269 | 0.217 | 40.625 | 62.667  | 15.429 |
| 90 | White | AC. 43669 | 1.028 | 0.243 | 0.115 | 55.063 | 31.505  | 40.175 |

|     |       |              |       |       |       |         |        |        |
|-----|-------|--------------|-------|-------|-------|---------|--------|--------|
| 91  | White | AC. 43732    | 0.665 | 0.257 | 0.079 | 31.063  | 33.778 | 35.239 |
| 92  | White | AC. 43675    | 0.168 | 0.238 | 0.115 | 40.875  | 24.444 | 32.678 |
| 93  | White | Kalinga-2    | 0.195 | 0.103 | 0.160 | 41.000  | 42.556 | 14.750 |
| 94  | White | Kalinga-3    | 0.223 | 0.058 | 0.168 | 28.750  | 34.778 | 13.400 |
| 95  | White | Hazaridhan   | 0.099 | 0.134 | 0.118 | 30.688  | 45.778 | 15.770 |
| 96  | White | Satabdi      | 0.111 | 0.141 | 0.082 | 28.125  | 22.889 | 14.145 |
| 97  | White | Swarna-Sub1  | 0.160 | 0.228 | 0.164 | 33.000  | 18.111 | 15.255 |
| 98  | White | Naveen       | 0.220 | 0.056 | 0.174 | 45.313  | 34.667 | 15.190 |
| 99  | White | Satyabhama   | 0.193 | 0.051 | 0.402 | 41.375  | 23.889 | 9.055  |
| 100 | White | Gitanjali    | 0.080 | 0.167 | 0.055 | 40.750  | 43.278 | 12.820 |
| 101 | White | CR Dhan 305  | 0.062 | 0.121 | 0.157 | 40.625  | 35.000 | 18.190 |
| 102 | White | CR Dhan 310  | 0.512 | 0.090 | 0.107 | 39.813  | 16.444 | 22.695 |
| 103 | White | CR Dhan 907  | 0.190 | 0.129 | 0.148 | 49.813  | 27.889 | 17.005 |
| 104 | White | Govindbhog   | 0.186 | 0.059 | 0.177 | 52.500  | 18.778 | 20.740 |
| 105 | White | Nuakalazeera | 0.121 | 0.169 | 0.123 | 60.250  | 25.444 | 21.930 |
| 106 | White | Masuri       | 0.216 | 0.079 | 0.143 | 44.375  | 35.222 | 20.200 |
| 107 | White | Heera        | 0.319 | 0.120 | 0.178 | 33.313  | 39.222 | 34.170 |
| 108 | White | Nuadhusara   | 0.164 | 0.228 | 0.165 | 53.125  | 17.000 | 13.190 |
| 109 | White | Banskathi    | 0.218 | 0.059 | 0.185 | 37.375  | 27.222 | 15.945 |
| 110 | White | Hanseswari   | 0.230 | 0.168 | 0.128 | 47.125  | 25.000 | 15.185 |
| 111 | White | Savitri      | 0.236 | 0.071 | 0.183 | 30.750  | 18.667 | 16.940 |
| 112 | White | Dhalaheera   | 0.218 | 0.091 | 0.084 | 40.750  | 28.444 | 16.390 |
| 113 | White | Mahulata     | 0.182 | 0.119 | 0.174 | 51.563  | 15.333 | 15.025 |
| 114 | White | Padmini      | 0.431 | 0.135 | 0.126 | 33.125  | 24.222 | 11.890 |
| 115 | White | Ratna        | 0.419 | 0.109 | 0.107 | 27.688  | 17.222 | 20.680 |
| 116 | White | Annada       | 0.520 | 0.060 | 0.183 | 42.938  | 29.778 | 21.760 |
| 117 | White | Gomati       | 0.486 | 0.122 | 0.174 | 32.875  | 18.889 | 16.000 |
| 118 | White | Lalat        | 0.315 | 0.117 | 0.167 | 33.438  | 27.333 | 18.480 |
| 119 | White | Chinikamini  | 0.221 | 0.122 | 0.161 | 67.688  | 26.667 | 16.460 |
| 120 | White | CR Dhan 801  | 0.251 | 0.066 | 0.122 | 31.020  | 25.895 | 18.685 |
| 121 | White | Pratikshya   | 0.319 | 0.097 | 0.152 | 34.420  | 36.435 | 19.795 |
| 122 | Red   | Landi        | 1.380 | 0.142 | 0.918 | 28.000  | 63.111 | 29.480 |
| 123 | Red   | AC9050       | 0.395 | 0.191 | 0.388 | 28.313  | 54.889 | 32.411 |
| 124 | Red   | AC9038       | 0.371 | 0.241 | 0.459 | 28.438  | 47.000 | 41.341 |
| 125 | Red   | AC9028       | 0.776 | 0.216 | 0.250 | 87.500  | 45.556 | 36.976 |
| 126 | Red   | AC9063       | 0.860 | 0.235 | 0.375 | 110.563 | 52.222 | 23.538 |
| 127 | Red   | AC9065       | 0.353 | 0.176 | 0.359 | 44.875  | 61.778 | 30.485 |
| 128 | Red   | AC9011       | 0.755 | 0.204 | 0.442 | 82.063  | 58.222 | 31.740 |
| 129 | Red   | AC20246      | 1.083 | 0.279 | 2.846 | 67.875  | 69.333 | 41.947 |

|     |     |                        |       |       |        |        |         |        |
|-----|-----|------------------------|-------|-------|--------|--------|---------|--------|
| 130 | Red | AC20282                | 1.118 | 0.201 | 1.043  | 84.500 | 76.889  | 42.167 |
| 131 | Red | AC 20423               | 0.713 | 0.182 | 0.434  | 46.625 | 53.000  | 33.031 |
| 132 | Red | AC 20614               | 0.727 | 0.273 | 0.609  | 85.250 | 62.841  | 38.448 |
| 133 | Red | AC 20627               | 1.164 | 0.245 | 0.451  | 93.375 | 45.333  | 22.694 |
| 134 | Red | AC20770                | 1.379 | 0.313 | 0.568  | 62.688 | 62.333  | 35.959 |
| 135 | Red | AC20907                | 0.919 | 0.308 | 0.551  | 64.750 | 52.444  | 26.501 |
| 136 | Red | AC20920                | 1.264 | 0.312 | 0.325  | 54.125 | 43.889  | 26.061 |
| 137 | Red | AC 20347               | 1.188 | 0.292 | 0.272  | 57.313 | 23.778  | 27.906 |
| 138 | Red | Kanta kapura           | 0.947 | 0.068 | 0.417  | 39.000 | 62.333  | 36.994 |
| 139 | Red | Kantakaamala           | 1.202 | 0.116 | 0.451  | 34.875 | 60.111  | 31.503 |
| 140 | Red | Kapanthi               | 0.989 | 0.177 | 0.451  | 10.813 | 41.444  | 41.757 |
| 141 | Red | Kathidhan              | 0.087 | 0.143 | 0.601  | 25.750 | 35.222  | 28.107 |
| 142 | Red | Kunda dhan             | 0.489 | 0.008 | 0.876  | 30.063 | 56.556  | 39.595 |
| 143 | Red | Champaesiali           | 0.360 | 0.222 | 0.534  | 20.688 | 31.444  | 30.275 |
| 144 | Red | Lata chaunri           | 0.507 | 0.211 | 1.018  | 19.875 | 50.444  | 30.925 |
| 145 | Red | Gondia<br>champeisiali | 0.762 | 0.213 | 0.626  | 24.750 | 54.556  | 24.855 |
| 146 | Red | Kaniar                 | 1.027 | 0.214 | 0.651  | 39.000 | 16.778  | 21.532 |
| 147 | Red | Adira-1                | 0.350 | 0.137 | 0.943  | 46.750 | 114.222 | 39.115 |
| 148 | Red | Adira-2                | 0.511 | 0.094 | 0.901  | 54.313 | 80.111  | 38.316 |
| 149 | Red | Adira-3                | 0.472 | 0.039 | 2.996  | 48.750 | 79.667  | 38.099 |
| 150 | Red | PK6                    | 0.217 | 0.112 | 1.168  | 46.125 | 62.222  | 33.091 |
| 151 | Red | Vachaw                 | 0.388 | 0.078 | 1.568  | 47.563 | 54.111  | 39.317 |
| 152 | Red | Kozhivalan             | 0.476 | 0.007 | 0.684  | 51.500 | 67.667  | 27.279 |
| 153 | Red | Marathondi             | 0.479 | 0.059 | 0.501  | 45.188 | 45.556  | 35.626 |
| 154 | Red | Ezhoml-2               | 0.234 | 0.035 | 0.801  | 46.688 | 85.667  | 33.512 |
| 155 | Red | Cheruvirippu           | 0.315 | 0.114 | 0.676  | 37.313 | 89.667  | 37.205 |
| 156 | Red | Pk-21                  | 0.269 | 0.169 | 0.568  | 40.000 | 44.222  | 32.964 |
| 157 | Red | Sreyas                 | 0.217 | 0.148 | 0.618  | 57.375 | 119.889 | 31.495 |
| 158 | Red | Jyothi                 | 0.437 | 0.062 | 0.901  | 56.750 | 58.889  | 31.916 |
| 159 | Red | Mahamaga               | 0.343 | 0.187 | 0.584  | 38.000 | 40.778  | 33.861 |
| 160 | Red | D1                     | 0.164 | 0.153 | 0.451  | 81.938 | 73.111  | 37.997 |
| 161 | Red | Airweregga             | 0.280 | 0.091 | 0.801  | 48.063 | 43.444  | 28.395 |
| 162 | Red | Umamata                | 0.245 | 0.153 | 0.534  | 48.313 | 59.333  | 31.375 |
| 163 | Red | Bharati                | 0.108 | 0.235 | 0.442  | 41.250 | 35.667  | 33.669 |
| 164 | Red | Rohidhan-1             | 0.049 | 0.193 | 0.559  | 41.250 | 36.164  | 33.085 |
| 165 | Red | Ganorhibuna            | 0.206 | 0.278 | 13.875 | 88.375 | 40.333  | 38.405 |
| 166 | Red | Kadamful               | 0.157 | 0.239 | 2.721  | 50.625 | 64.778  | 32.675 |
| 167 | Red | Palina dhan-2          | 0.077 | 0.297 | 21.782 | 74.375 | 36.886  | 31.390 |
| 168 | Red | AC. 10162              | 0.259 | 0.192 | 0.526  | 45.000 | 81.333  | 32.397 |



|     |     |               |       |       |        |        |         |        |
|-----|-----|---------------|-------|-------|--------|--------|---------|--------|
| 169 | Red | AC. 44585     | 0.693 | 0.188 | 0.918  | 61.000 | 80.111  | 38.705 |
| 170 | Red | AC. 44588     | 0.910 | 0.223 | 1.302  | 59.750 | 227.778 | 50.368 |
| 171 | Red | AC. 44591     | 1.158 | 0.206 | 0.818  | 47.188 | 124.111 | 35.147 |
| 172 | Red | AC. 44592     | 1.032 | 0.118 | 2.320  | 64.938 | 242.000 | 50.515 |
| 173 | Red | AC. 44594     | 0.986 | 0.191 | 3.388  | 60.563 | 183.222 | 35.735 |
| 174 | Red | AC. 44595     | 1.014 | 0.145 | 6.618  | 66.500 | 334.111 | 69.412 |
| 175 | Red | AC. 44646     | 1.025 | 0.251 | 10.407 | 63.938 | 316.889 | 58.750 |
| 176 | Red | AC. 43658     | 0.325 | 0.269 | 19.796 | 38.688 | 79.778  | 52.475 |
| 177 | Red | AC. 43670     | 0.115 | 0.282 | 28.375 | 56.813 | 358.444 | 81.441 |
| 178 | Red | AC. 43676     | 0.161 | 0.186 | 10.280 | 34.188 | 226.333 | 46.288 |
| 179 | Red | AC.43737      | 0.136 | 0.295 | 11.934 | 37.375 | 230.222 | 48.544 |
| 180 | Red | AC. 43738     | 0.164 | 0.274 | 11.274 | 47.500 | 246.000 | 53.566 |
| 181 | Red | Alkachuri     | 0.451 | 0.091 | 1.843  | 41.125 | 69.333  | 51.525 |
| 182 | Red | Amonabao      | 0.511 | 0.109 | 2.457  | 47.688 | 117.111 | 42.005 |
| 183 | Red | Annapurna     | 0.220 | 0.096 | 5.093  | 36.875 | 184.200 | 65.165 |
| 184 | Red | Assambiroin   | 0.324 | 0.114 | 3.335  | 53.250 | 226.000 | 38.610 |
| 185 | Red | Balam         | 0.414 | 0.060 | 2.989  | 80.375 | 284.800 | 55.050 |
| 186 | Red | Bambi mugai   | 0.555 | 0.067 | 4.560  | 43.375 | 105.222 | 44.700 |
| 187 | Red | Barbali       | 0.335 | 0.050 | 4.340  | 40.125 | 85.333  | 39.885 |
| 188 | Red | Barhasal      | 0.438 | 0.096 | 1.642  | 33.250 | 138.333 | 56.075 |
| 189 | Red | Baskati       | 0.516 | 0.250 | 2.858  | 30.375 | 131.778 | 59.720 |
| 190 | Red | Baula         | 0.671 | 0.134 | 1.789  | 32.875 | 107.444 | 62.250 |
| 191 | Red | Bhasakalma    | 0.420 | 0.266 | 3.933  | 35.938 | 102.889 | 60.680 |
| 192 | Red | Chhota dahiya | 0.516 | 0.079 | 2.444  | 51.875 | 107.667 | 61.755 |
| 193 | Red | Chingair      | 0.429 | 0.115 | 3.746  | 45.125 | 122.111 | 40.840 |
| 194 | Red | Dhanigoda     | 0.438 | 0.100 | 1.709  | 35.125 | 104.444 | 44.825 |
| 195 | Red | Gandhi biroin | 0.316 | 0.111 | 2.153  | 49.155 | 87.660  | 51.320 |
| 196 | Red | Gengene       | 0.537 | 0.215 | 1.843  | 26.313 | 85.556  | 50.980 |
| 197 | Red | Hermanona     | 0.454 | 0.118 | 2.751  | 58.688 | 151.667 | 40.970 |
| 198 | Red | Hugla         | 0.425 | 0.216 | 2.671  | 35.938 | 135.778 | 44.460 |
| 199 | Red | Jool          | 0.410 | 0.229 | 2.464  | 42.313 | 190.400 | 72.715 |
| 200 | Red | Kakharua      | 0.356 | 0.137 | 2.350  | 43.313 | 151.444 | 71.730 |
| 201 | Red | Kaksal        | 0.507 | 0.107 | 1.816  | 40.188 | 80.667  | 32.710 |
| 202 | Red | Kalakatki     | 0.449 | 0.116 | 2.657  | 34.438 | 152.778 | 38.855 |
| 203 | Red | Kalokumara    | 0.600 | 0.216 | 1.990  | 43.750 | 108.333 | 41.465 |
| 204 | Red | Karaga goda   | 0.458 | 0.170 | 1.576  | 39.250 | 88.333  | 32.315 |
| 205 | Red | Karhani       | 0.520 | 0.232 | 1.602  | 36.625 | 114.889 | 20.765 |
| 206 | Red | Karnidhan     | 0.290 | 0.139 | 5.148  | 64.688 | 84.778  | 62.215 |
| 207 | Red | Katraibhog    | 0.371 | 0.088 | 4.273  | 55.365 | 128.889 | 55.510 |

|     |     |                |       |       |       |        |         |        |
|-----|-----|----------------|-------|-------|-------|--------|---------|--------|
| 208 | Red | Kelash 1981    | 0.447 | 0.131 | 1.776 | 41.625 | 92.667  | 26.560 |
| 209 | Red | Koya 4         | 0.417 | 0.240 | 5.575 | 46.750 | 105.889 | 50.105 |
| 210 | Red | Koya ho baba   | 0.390 | 0.115 | 5.889 | 52.688 | 94.000  | 52.405 |
| 211 | Red | Lalbora        | 0.325 | 0.142 | 2.073 | 26.500 | 153.200 | 28.745 |
| 212 | Red | Langal muthi   | 0.339 | 0.221 | 1.869 | 43.188 | 103.222 | 19.795 |
| 213 | Red | Likekakua      | 0.452 | 0.250 | 1.856 | 33.875 | 168.222 | 20.690 |
| 214 | Red | Marchal        | 0.427 | 0.120 | 1.602 | 41.625 | 91.333  | 21.670 |
| 215 | Red | Meghi          | 0.340 | 0.160 | 3.205 | 51.313 | 138.778 | 26.080 |
| 216 | Red | Mornodoiga     | 0.426 | 0.111 | 4.762 | 74.438 | 267.800 | 28.910 |
| 217 | Red | Motarmala      | 0.458 | 0.150 | 1.776 | 45.500 | 65.778  | 23.265 |
| 218 | Red | Mugai          | 0.340 | 0.137 | 3.230 | 37.125 | 157.200 | 24.515 |
| 219 | Red | Mugai          | 0.420 | 0.112 | 1.816 | 22.875 | 118.889 | 24.900 |
| 220 | Red | Nagheri        | 0.220 | 0.216 | 3.098 | 50.625 | 85.667  | 32.580 |
| 221 | Red | Nagheri        | 0.238 | 0.136 | 1.923 | 49.188 | 116.556 | 21.375 |
| 222 | Red | Nalbora        | 0.359 | 0.049 | 1.292 | 32.625 | 186.400 | 23.830 |
| 223 | Red | Neta           | 0.416 | 0.207 | 1.896 | 33.500 | 87.000  | 26.865 |
| 224 | Red | Netakalani     | 0.490 | 0.186 | 1.642 | 30.500 | 84.556  | 22.995 |
| 225 | Red | Nirjhara       | 0.468 | 0.165 | 1.910 | 67.438 | 91.111  | 27.805 |
| 226 | Red | Palbari        | 0.515 | 0.126 | 1.616 | 31.313 | 140.222 | 21.380 |
| 227 | Red | Panati         | 0.478 | 0.076 | 1.696 | 56.063 | 129.444 | 32.655 |
| 228 | Red | PB140          | 0.515 | 0.111 | 2.118 | 35.563 | 179.800 | 43.210 |
| 229 | Red | Rajesh         | 0.487 | 0.178 | 1.923 | 44.875 | 134.778 | 39.120 |
| 230 | Red | RPHP112        | 0.480 | 0.255 | 1.803 | 34.875 | 95.000  | 33.540 |
| 231 | Red | Saathi         | 0.390 | 0.244 | 2.689 | 35.688 | 182.000 | 41.790 |
| 232 | Red | Setka 36       | 0.653 | 0.228 | 2.704 | 32.750 | 176.200 | 35.435 |
| 233 | Red | Sugandha       | 0.530 | 0.230 | 4.320 | 53.500 | 167.800 | 60.750 |
| 234 | Red | Urebanga       | 0.742 | 0.219 | 1.682 | 37.750 | 104.000 | 18.950 |
| 235 | Red | Vutmari        | 0.660 | 0.221 | 5.308 | 45.750 | 106.556 | 65.580 |
| 236 | Red | Geda           | 0.547 | 0.216 | 2.120 | 28.125 | 80.949  | 55.310 |
| 237 | Red | Haldigundi     | 0.391 | 0.117 | 2.099 | 39.000 | 78.367  | 51.575 |
| 238 | Red | Saraga debangi | 0.487 | 0.096 | 2.151 | 49.625 | 78.181  | 63.075 |
| 239 | Red | Kadara         | 0.571 | 0.116 | 2.261 | 53.625 | 90.181  | 55.460 |
| 240 | Red | Sundarmadei    | 0.528 | 0.085 | 2.101 | 58.625 | 87.364  | 49.875 |
| 241 | Red | Sundargada     | 0.537 | 0.109 | 2.338 | 50.000 | 101.891 | 54.475 |
| 242 | Red | Kala dhusura   | 0.622 | 0.149 | 2.196 | 60.000 | 86.189  | 59.750 |
| 243 | Red | Godhikhejara   | 0.535 | 0.104 | 2.369 | 40.875 | 83.167  | 61.345 |
| 244 | Red | Laxmi kajal    | 0.619 | 0.117 | 2.186 | 61.375 | 89.727  | 63.560 |
| 245 | Red | Mugei          | 0.520 | 0.159 | 2.382 | 51.125 | 94.459  | 58.305 |
| 246 | Red | Mugi           | 0.497 | 0.222 | 2.830 | 51.000 | 98.816  | 60.670 |

|              |     |                 |              |              |               |               |               |               |
|--------------|-----|-----------------|--------------|--------------|---------------|---------------|---------------|---------------|
| 247          | Red | Jhumpuri malata | 0.402        | 0.153        | 2.544         | 37.250        | 89.848        | 61.820        |
| 248          | Red | Sal jhantri     | 0.535        | 0.104        | 2.507         | 37.750        | 73.799        | 66.905        |
| 249          | Red | Nathmohan       | 0.430        | 0.053        | 3.550         | 44.875        | 93.181        | 67.800        |
| 250          | Red | Hundamakara     | 0.492        | 0.120        | 3.098         | 50.625        | 102.083       | 65.550        |
| 251          | Red | Dhoba kakiri    | 0.516        | 0.112        | 3.000         | 43.250        | 107.105       | 67.385        |
| 252          | Red | Boula           | 0.487        | 0.128        | 2.925         | 46.750        | 96.201        | 68.620        |
| 253          | Red | Sundarbhojna    | 0.480        | 0.229        | 3.198         | 53.250        | 107.069       | 59.730        |
| 254          | Red | Kuliha          | 0.542        | 0.216        | 2.553         | 39.375        | 92.556        | 60.755        |
| 255          | Red | Hajirimala      | 0.367        | 0.122        | 2.598         | 58.750        | 86.962        | 55.640        |
| 256          | Red | Nadiarasa       | 0.460        | 0.052        | 2.587         | 30.750        | 104.467       | 44.985        |
| 257          | Red | Kalanpati       | 0.570        | 0.121        | 2.678         | 28.125        | 96.688        | 53.965        |
| 258          | Red | Majhi           | 0.685        | 0.060        | 2.899         | 42.625        | 110.284       | 57.635        |
| 259          | Red | Kalajeri        | 0.364        | 0.220        | 2.667         | 26.125        | 112.723       | 56.775        |
| 260          | Red | Majhi           | 0.413        | 0.083        | 2.989         | 38.750        | 96.534        | 49.795        |
| 261          | Red | Sunakathi       | 0.450        | 0.141        | 3.174         | 64.250        | 115.401       | 52.705        |
| 262          | Red | Luna            | 0.525        | 0.217        | 3.399         | 54.010        | 217.549       | 51.615        |
| 263          | Red | Abhirman        | 0.493        | 0.202        | 2.736         | 64.130        | 192.620       | 55.710        |
| 264          | Red | Kalakanhu       | 0.384        | 0.184        | 3.469         | 56.685        | 203.691       | 61.820        |
| 265          | Red | Pologada        | 0.531        | 0.067        | 3.164         | 56.598        | 130.309       | 62.615        |
| 266          | Red | Majhi           | 0.481        | 0.224        | 3.786         | 50.848        | 264.755       | 59.935        |
| 267          | Red | Rajapateni      | 0.391        | 0.239        | 2.232         | 35.230        | 189.104       | 63.745        |
| 268          | Red | Dalipahata      | 0.420        | 0.242        | 3.783         | 40.118        | 186.620       | 61.385        |
| 269          | Red | Kadara          | 0.493        | 0.279        | 3.486         | 46.050        | 190.320       | 60.655        |
| 270          | Red | Nadiarasa       | 0.552        | 0.292        | 3.441         | 57.938        | 165.787       | 59.905        |
| <b>Mean</b>  |     |                 | <b>0.586</b> | <b>0.200</b> | <b>1.924</b>  | <b>48.209</b> | <b>61.059</b> | <b>20.678</b> |
| <b>CV</b>    |     |                 | <b>13.12</b> | <b>2.432</b> | <b>33.800</b> | <b>1.712</b>  | <b>6.824</b>  | <b>6.600</b>  |
| <b>LSD5%</b> |     |                 | <b>0.065</b> | <b>0.076</b> | <b>0.891</b>  | <b>3.234</b>  | <b>7.858</b>  | <b>2.721</b>  |

Carotenoids (mg g<sup>-1</sup>); SOD: super oxide dismutase (unit g<sup>-1</sup>); TAC: total anthocyanin content(mg 100g<sup>-1</sup>); GO: gamma-oryzanol (mg 100 g<sup>-1</sup>); TFC: Total flavonoids content (mg catechine or CEt 100 g<sup>-1</sup>) and ABTS: 2,2'-azino-bis 3-ethylbenzothiazoline-6-sulfonic acid (% inhibition).

**Supplementary Table 2.** The inferred ancestry value and population structure of individual member with their antioxidants classification in the panel population at K=2 & K=3.

| Sl. No. | Accession No./ Vernacular name of germplasm line | Inferred ancestry value at K=2 | Inferred ancestry value at K=3 | Structure Group | Antioxidants content in each germplasm line |
|---------|--------------------------------------------------|--------------------------------|--------------------------------|-----------------|---------------------------------------------|
|---------|--------------------------------------------------|--------------------------------|--------------------------------|-----------------|---------------------------------------------|

|    |             | Q1    | Q2    | Q1    | Q2    | Q3    |       |                       |
|----|-------------|-------|-------|-------|-------|-------|-------|-----------------------|
| 1  | AC. 5993    | 0.006 | 0.994 | 0.003 | 0.995 | 0.003 | SP2   | high SOD              |
| 2  | AC. 6221    | 0.012 | 0.988 | 0.007 | 0.991 | 0.002 | SP2   | Low                   |
| 3  | AC. 6183    | 0.088 | 0.912 | 0.072 | 0.925 | 0.003 | SP2   | Low                   |
| 4  | AC. 6170    | 0.006 | 0.994 | 0.003 | 0.995 | 0.002 | SP2   | high Carotenoid       |
| 5  | AC. 6023    | 0.034 | 0.966 | 0.02  | 0.978 | 0.002 | SP2   | high SOD              |
| 6  | AC. 6172    | 0.072 | 0.928 | 0.051 | 0.948 | 0.002 | SP2   | Low                   |
| 7  | AC. 6027    | 0.61  | 0.39  | 0.002 | 0.005 | 0.993 | SP3   | Low                   |
| 8  | AC. 6007    | 0.008 | 0.992 | 0.004 | 0.995 | 0.001 | SP2   | Low                   |
| 9  | AC. 9006    | 0.057 | 0.943 | 0.02  | 0.971 | 0.009 | SP2   | high                  |
| 10 | AC. 9021    | 0.024 | 0.976 | 0.013 | 0.982 | 0.005 | SP2   | Low                   |
| 11 | AC. 9028    | 0.074 | 0.926 | 0.069 | 0.928 | 0.003 | SP2   | high GO& SOD          |
| 12 | AC. 9030    | 0.006 | 0.994 | 0.006 | 0.994 | 0.001 | SP2   | Low                   |
| 13 | AC. 9035    | 0.011 | 0.989 | 0.004 | 0.983 | 0.014 | SP2   | Low                   |
| 14 | AC. 9038    | 0.003 | 0.997 | 0.001 | 0.998 | 0.001 | SP2   | high SOD              |
| 15 | AC. 9043    | 0.003 | 0.997 | 0.002 | 0.997 | 0.001 | SP2   | Low                   |
| 16 | AC. 9044    | 0.007 | 0.993 | 0.003 | 0.993 | 0.005 | SP2   | high SOD              |
| 17 | AC. 20920   | 0.007 | 0.993 | 0.003 | 0.993 | 0.004 | SP2   | high SOD & Carotenoid |
| 18 | AC. 20907   | 0.004 | 0.996 | 0.002 | 0.997 | 0.001 | SP2   | high SOD              |
| 19 | AC. 20845   | 0.005 | 0.995 | 0.003 | 0.996 | 0.001 | SP2   | high Carotenoid       |
| 20 | AC. 20770   | 0.004 | 0.996 | 0.002 | 0.993 | 0.005 | SP2   | high SOD & Carotenoid |
| 21 | AC. 20627   | 0.003 | 0.997 | 0.002 | 0.997 | 0.001 | SP2   | high Carotenoid & SOD |
| 22 | AC. 20686   | 0.003 | 0.997 | 0.002 | 0.997 | 0.001 | SP2   | high SOD              |
| 23 | AC. 20664   | 0.005 | 0.995 | 0.003 | 0.996 | 0.001 | SP2   | Medium                |
| 24 | AC. 20614   | 0.003 | 0.997 | 0.001 | 0.996 | 0.002 | SP2   | high SOD              |
| 25 | Jhagrikarti | 0.014 | 0.986 | 0.008 | 0.99  | 0.002 | SP2   | high GO               |
| 26 | Dadghani    | 0.014 | 0.986 | 0.005 | 0.992 | 0.003 | SP2   | high SOD              |
| 27 | Shayam      | 0.602 | 0.398 | 0.001 | 0.002 | 0.996 | SP3   | Very low              |
| 28 | Basumati    | 0.529 | 0.471 | 0.005 | 0.113 | 0.883 | SP3   | Very low              |
| 29 | Bharati     | 0.002 | 0.998 | 0.001 | 0.997 | 0.002 | SP2   | high SOD              |
| 30 | Joha        | 0.003 | 0.997 | 0.002 | 0.997 | 0.002 | SP2   | high SOD              |
| 31 | Adira-1     | 0.283 | 0.717 | 0.019 | 0.619 | 0.362 | Admix | Medium                |
| 32 | Adira-2     | 0.003 | 0.997 | 0.002 | 0.997 | 0.001 | SP2   | Medium                |
| 33 | Adira-3     | 0.239 | 0.761 | 0.003 | 0.593 | 0.403 | Admix | Medium                |
| 34 | PK6         | 0.012 | 0.988 | 0.004 | 0.982 | 0.014 | SP2   | Low                   |
| 35 | Vachaw      | 0.015 | 0.985 | 0.002 | 0.961 | 0.037 | SP2   | Medium                |
| 36 | Kozhivalan  | 0.003 | 0.997 | 0.002 | 0.997 | 0.001 | SP2   | Low                   |
| 37 | Marathondi  | 0.379 | 0.621 | 0.034 | 0.516 | 0.45  | Admix | Medium                |

|    |               |       |       |       |       |       |       |                       |
|----|---------------|-------|-------|-------|-------|-------|-------|-----------------------|
| 38 | Ezhoml-2      | 0.002 | 0.998 | 0.001 | 0.998 | 0.001 | SP2   | Medium                |
| 39 | Jyothi        | 0.002 | 0.998 | 0.001 | 0.998 | 0.001 | SP2   | Medium                |
| 40 | Kantakopura   | 0.003 | 0.997 | 0.001 | 0.997 | 0.002 | SP2   | Medium                |
| 41 | Kantakaamal   | 0.281 | 0.719 | 0.109 | 0.675 | 0.216 | Admix | Medium                |
| 42 | Kapanthi      | 0.566 | 0.434 | 0.341 | 0.304 | 0.355 | Admix | Low                   |
| 43 | Karpurkanti   | 0.563 | 0.437 | 0.001 | 0.001 | 0.998 | SP3   | Very low              |
| 44 | Kathidhan     | 0.114 | 0.886 | 0.097 | 0.898 | 0.005 | SP2   | Medium                |
| 45 | Kundadhan     | 0.007 | 0.993 | 0.005 | 0.994 | 0.001 | SP2   | Low                   |
| 46 | Champaesia    | 0.006 | 0.994 | 0.003 | 0.993 | 0.004 | SP2   | high SOD              |
| 47 | Latamahu      | 0.005 | 0.995 | 0.003 | 0.996 | 0.002 | SP2   | Medium                |
| 48 | Latachaunri   | 0.008 | 0.992 | 0.005 | 0.993 | 0.002 | SP2   | high SOD              |
| 49 | AC. 10608     | 0.006 | 0.994 | 0.006 | 0.994 | 0.001 | SP2   | Low                   |
| 50 | AC. 10187     | 0.076 | 0.924 | 0.081 | 0.917 | 0.002 | SP2   | Low                   |
| 51 | AC. 10162     | 0.057 | 0.943 | 0.023 | 0.96  | 0.017 | SP2   | Low                   |
| 52 | AC. 7282      | 0.604 | 0.396 | 0.001 | 0.002 | 0.997 | SP3   | Very low              |
| 53 | AC. 7269      | 0.005 | 0.995 | 0.002 | 0.997 | 0.001 | SP2   | Very low              |
| 54 | AC. 7134      | 0.197 | 0.803 | 0.009 | 0.793 | 0.198 | Admix | Low                   |
| 55 | AC. 7008      | 0.003 | 0.997 | 0.002 | 0.998 | 0.001 | SP2   | Low                   |
| 56 | AC. 9093      | 0.004 | 0.996 | 0.001 | 0.995 | 0.004 | SP2   | high SOD              |
| 57 | AC. 9090      | 0.01  | 0.99  | 0.004 | 0.987 | 0.01  | SP2   | high SOD              |
| 58 | AC. 9076A     | 0.011 | 0.989 | 0.006 | 0.993 | 0.001 | SP2   | Low                   |
| 59 | AC. 9065      | 0.009 | 0.991 | 0.003 | 0.963 | 0.034 | SP2   | Low                   |
| 60 | AC. 9063      | 0.009 | 0.991 | 0.007 | 0.992 | 0.001 | SP2   | GO & SOD              |
| 61 | AC. 9058      | 0.002 | 0.998 | 0.001 | 0.998 | 0.001 | SP2   | Low                   |
| 62 | AC. 9053A     | 0.157 | 0.843 | 0.153 | 0.839 | 0.008 | SP2   | Low                   |
| 63 | AC. 9050      | 0.005 | 0.995 | 0.002 | 0.994 | 0.004 | SP2   | Low                   |
| 64 | AC. 9005      | 0.011 | 0.989 | 0.004 | 0.993 | 0.002 | SP2   | high SOD              |
| 65 | AC. 20389     | 0.081 | 0.919 | 0.046 | 0.943 | 0.011 | SP2   | high Carotenoid &SOD  |
| 66 | AC. 20371     | 0.01  | 0.99  | 0.007 | 0.992 | 0.001 | SP2   | high GO&SOD           |
| 67 | AC. 20423     | 0.005 | 0.995 | 0.003 | 0.996 | 0.001 | SP2   | Medium                |
| 68 | AC. 20362     | 0.03  | 0.97  | 0.018 | 0.975 | 0.007 | SP2   | high SOD,             |
| 69 | AC. 20328     | 0.018 | 0.982 | 0.009 | 0.979 | 0.012 | SP2   | high SOD              |
| 70 | AC. 20317     | 0.012 | 0.988 | 0.003 | 0.973 | 0.024 | SP2   | high SOD              |
| 71 | AC. 20282     | 0.127 | 0.873 | 0.108 | 0.886 | 0.006 | SP2   | high GO &SOD,         |
| 72 | AC. 20246     | 0.137 | 0.863 | 0.024 | 0.89  | 0.086 | SP2   | high SOD & Carotenoid |
| 73 | AC. 20347     | 0.091 | 0.909 | 0.066 | 0.932 | 0.001 | SP2   | high SOD& Carotenoid  |
| 74 | Palinadhan-   | 0.46  | 0.54  | 0.237 | 0.393 | 0.371 | Admix | high SOD              |
| 75 | Chatuimuchi   | 0.647 | 0.353 | 0.001 | 0.001 | 0.998 | SP3   | high SOD              |
| 76 | Uttarbanganal | 0.116 | 0.884 | 0.094 | 0.904 | 0.001 | SP2   | high SOD              |

|     |              |       |       |       |       |       |       |                                    |
|-----|--------------|-------|-------|-------|-------|-------|-------|------------------------------------|
| 77  | Gochi        | 0.099 | 0.901 | 0.065 | 0.927 | 0.008 | SP2   | high SOD                           |
| 78  | Sugandha-2   | 0.605 | 0.395 | 0.001 | 0.002 | 0.997 | SP3   | high SOD                           |
| 79  | Jhingesal    | 0.003 | 0.997 | 0.002 | 0.997 | 0.001 | SP2   | high SOD                           |
| 80  | Cheruviripp  | 0.007 | 0.993 | 0.004 | 0.994 | 0.001 | SP2   | Low                                |
| 81  | Mahamaga     | 0.046 | 0.954 | 0.047 | 0.951 | 0.002 | SP2   | Very low                           |
| 82  | Jaya         | 0.01  | 0.99  | 0.009 | 0.99  | 0.001 | SP2   | Low                                |
| 83  | D1           | 0.089 | 0.911 | 0.049 | 0.94  | 0.011 | SP2   | Low                                |
| 84  | PK21         | 0.021 | 0.979 | 0.016 | 0.983 | 0.001 | SP2   | Low                                |
| 85  | Gandhakasal  | 0.615 | 0.385 | 0.003 | 0.004 | 0.993 | SP3   | high SOD,                          |
| 86  | Sreyas       | 0.006 | 0.994 | 0.002 | 0.995 | 0.002 | SP2   | Medium                             |
| 87  | GondiAc.hamp | 0.006 | 0.994 | 0.003 | 0.995 | 0.002 | SP2   | high SOD                           |
| 88  | Chinamal     | 0.005 | 0.995 | 0.002 | 0.983 | 0.015 | SP2   | high SOD                           |
| 89  | Magra        | 0.004 | 0.996 | 0.002 | 0.995 | 0.003 | SP2   | high SOD                           |
| 90  | Landi        | 0.003 | 0.997 | 0.002 | 0.997 | 0.002 | SP2   | Low                                |
| 91  | Lalgundi     | 0.009 | 0.991 | 0.004 | 0.989 | 0.006 | SP2   | high SOD                           |
| 92  | Balisaralak  | 0.005 | 0.995 | 0.003 | 0.993 | 0.003 | SP2   | VL,L,SOD                           |
| 93  | Laxmibilash  | 0.335 | 0.665 | 0.003 | 0.427 | 0.57  | Admix | Very low                           |
| 94  | Kaniar       | 0.011 | 0.989 | 0.005 | 0.981 | 0.015 | SP2   | high Carotenoid &SOD               |
| 95  | Kanakchampa  | 0.011 | 0.989 | 0.004 | 0.982 | 0.015 | SP2   | high SOD                           |
| 96  | Magura-S     | 0.007 | 0.993 | 0.002 | 0.914 | 0.084 | SP2   | high SOD                           |
| 97  | AC. 44603    | 0.953 | 0.047 | 0.985 | 0.014 | 0.001 | SP1   | high Carotenoid &SOD               |
| 98  | AC. 44585    | 0.992 | 0.008 | 0.989 | 0.003 | 0.008 | SP1   | Low                                |
| 99  | AC. 44598    | 0.99  | 0.01  | 0.988 | 0.007 | 0.006 | SP1   | high Carotenoid                    |
| 100 | AC. 44592    | 0.997 | 0.003 | 0.991 | 0.001 | 0.008 | SP1   | high Carotenoid ,TFC,ABTS          |
| 101 | AC. 44646    | 0.996 | 0.004 | 0.998 | 0.001 | 0.001 | SP1   | high Carotenoid ,TAC,TFC,SOD, ABTS |
| 102 | AC. 44604    | 0.988 | 0.012 | 0.977 | 0.013 | 0.01  | SP1   | high Carotenoid &SOD               |
| 103 | AC. 44597    | 0.994 | 0.006 | 0.997 | 0.002 | 0.001 | SP1   | high TFC &Carotenoid               |
| 104 | AC. 44638    | 0.979 | 0.021 | 0.29  | 0.001 | 0.71  | Admix | Low                                |
| 105 | AC. 44595    | 0.992 | 0.008 | 0.99  | 0.004 | 0.006 | SP1   | high SOD, Carotenoid,ABTS,         |
| 106 | AC. 44588    | 0.996 | 0.004 | 0.997 | 0.002 | 0.001 | SP1   | High ABTS                          |
| 107 | AC. 44591    | 0.994 | 0.006 | 0.998 | 0.002 | 0.001 | SP1   | high Carotenoid & SOD              |
| 108 | AC. 44594    | 0.979 | 0.021 | 0.99  | 0.008 | 0.002 | SP1   | high SOD                           |
| 109 | AC. 43737    | 0.996 | 0.004 | 0.996 | 0.002 | 0.002 | SP1   | high TAC &SOD                      |
| 110 | AC. 43660    | 0.993 | 0.007 | 0.997 | 0.002 | 0.001 | SP1   | high                               |

|     |           |       |       |       |       |       |     |                        |
|-----|-----------|-------|-------|-------|-------|-------|-----|------------------------|
|     |           |       |       |       |       |       |     | Caro,TAC,TFC,SOD, ABTS |
| 111 | AC. 43732 | 0.996 | 0.004 | 0.998 | 0.001 | 0.001 | SP1 | high SOD &ABTS         |
| 112 | AC. 43661 | 0.988 | 0.012 | 0.995 | 0.004 | 0.001 | SP1 | high SOD,              |
| 113 | AC. 43738 | 0.995 | 0.005 | 0.996 | 0.002 | 0.002 | SP1 | high SOD, ABTS,TAC,    |
| 114 | AC. 43669 | 0.993 | 0.007 | 0.994 | 0.004 | 0.002 | SP1 | high Caro,TAC,TFC,SOD, |
| 115 | AC. 43663 | 0.997 | 0.003 | 0.997 | 0.001 | 0.002 | SP1 | high SOD               |
| 116 | AC. 43658 | 0.998 | 0.002 | 0.998 | 0.001 | 0.001 | SP1 | High TAC &SOD          |
| 117 | AC. 43662 | 0.997 | 0.003 | 0.979 | 0.002 | 0.018 | SP1 | High SOD               |
| 118 | AC. 43670 | 0.995 | 0.005 | 0.827 | 0.002 | 0.171 | SP1 | High SOD, ABTS, TAC,   |
| 119 | AC. 43675 | 0.995 | 0.005 | 0.99  | 0.002 | 0.007 | SP1 | High TAC,SOD           |
| 120 | AC. 43676 | 0.99  | 0.01  | 0.959 | 0.008 | 0.033 | SP1 | High SOD               |

**Supplementary Table 3.** Marker-trait associations with antioxidant content in the panel population detected by the model GLM at  $p < 0.01$ .

| Trait      | Marker | marker_F | marker_p | marker_Rsq |
|------------|--------|----------|----------|------------|
| Carotenoid | RM582  | 11.44855 | 9.87E-04 | 0.08899    |
| Carotenoid | RM6275 | 10.05204 | 0.00196  | 0.07838    |
| Carotenoid | RM470  | 8.00203  | 0.00554  | 0.06398    |
| Carotenoid | RM494  | 6.98119  | 0.00942  | 0.0563     |
| Carotenoid | RM444  | 8.22632  | 0.00494  | 0.0662     |
| Carotenoid | RM8044 | 7.56706  | 0.00694  | 0.06124    |
| Carotenoid | RM274  | 6.90287  | 0.00982  | 0.05618    |
| SOD        | RM582  | 7.51326  | 0.00713  | 0.0617     |
| SOD        | RM216  | 13.46566 | 3.75E-04 | 0.10618    |
| SOD        | RM590  | 7.97223  | 0.00562  | 0.06522    |
| SOD        | RM405  | 8.28345  | 0.00479  | 0.06759    |
| SOD        | RM167  | 9.97903  | 0.00204  | 0.08095    |
| SOD        | RM229  | 7.25269  | 0.00817  | 0.05969    |
| SOD        | RM469  | 8.03191  | 0.00545  | 0.06567    |
| SOD        | RM7179 | 7.78045  | 0.00622  | 0.06429    |
| SOD        | RM502  | 7.75056  | 0.00631  | 0.06352    |
| SOD        | RM6641 | 7.91668  | 0.00579  | 0.06479    |
| SOD        | RM6641 | 9.13057  | 0.00312  | 0.07398    |
| SOD        | RM218  | 8.81596  | 0.00365  | 0.07162    |
| SOD        | RM220  | 9.2743   | 0.0029   | 0.07568    |
| SOD        | RM495  | 8.88408  | 0.00353  | 0.07213    |
| SOD        | RM8271 | 7.75104  | 0.0063   | 0.06353    |

|      |         |          |          |         |
|------|---------|----------|----------|---------|
| SOD  | RM467   | 9.70831  | 0.00233  | 0.07829 |
| SOD  | RM452   | 8.95919  | 0.0034   | 0.07269 |
| TAC  | RM440   | 10.07764 | 0.00194  | 0.06646 |
| TAC  | RM235   | 8.24613  | 0.00489  | 0.05521 |
| TAC  | RM5638  | 12.02036 | 7.47E-04 | 0.07803 |
| TAC  | RM253   | 11.30677 | 0.00106  | 0.07443 |
| TAC  | RM5626  | 9.36875  | 0.00276  | 0.06215 |
| GO   | RM3701  | 14.94433 | 1.87E-04 | 0.11729 |
| GO   | RM201   | 10.03624 | 0.00197  | 0.08063 |
| GO   | RM258   | 10.91018 | 0.00128  | 0.08774 |
| GO   | RM225   | 7.56181  | 0.00696  | 0.06305 |
| GO   | RM148   | 11.41522 | 0.00101  | 0.09218 |
| GO   | RM317   | 8.92155  | 0.00346  | 0.07293 |
| GO   | RM502   | 21.52493 | 9.54E-06 | 0.15935 |
| GO   | RM488   | 7.50203  | 0.00717  | 0.06206 |
| GO   | RM6374  | 10.88984 | 0.0013   | 0.0876  |
| GO   | RM434   | 7.43517  | 0.00743  | 0.06154 |
| GO   | RM245   | 8.11768  | 0.00522  | 0.0668  |
| GO   | RM441   | 12.20215 | 6.82E-04 | 0.09634 |
| TFC  | RM3701  | 11.62841 | 9.06E-04 | 0.06613 |
| TFC  | RM235   | 16.06018 | 1.11E-04 | 0.08746 |
| TFC  | RM148   | 8.14595  | 0.00515  | 0.04768 |
| TFC  | RM494   | 9.85164  | 0.00217  | 0.05638 |
| TFC  | RM220   | 8.65599  | 0.00397  | 0.05045 |
| ABTS | RM247   | 7.2658   | 0.00811  | 0.05004 |
| ABTS | RM470   | 9.5401   | 0.00254  | 0.06447 |
| ABTS | RM3701  | 12.55463 | 5.79E-04 | 0.08346 |
| ABTS | RM5739  | 8.67883  | 0.00392  | 0.05907 |
| ABTS | RM167   | 8.2232   | 0.00494  | 0.05618 |
| ABTS | RM235   | 8.08868  | 0.0053   | 0.05533 |
| ABTS | RM6547  | 10.37797 | 0.00167  | 0.06909 |
| ABTS | RM7179  | 9.48852  | 0.0026   | 0.06415 |
| ABTS | RM112   | 7.77549  | 0.00622  | 0.05332 |
| ABTS | RM13600 | 8.05288  | 0.00539  | 0.05464 |
| ABTS | RM468   | 11.66408 | 8.88E-04 | 0.07747 |



**Supplementary Table 4.** Marker-trait associations with antioxidant content in the panel population detected by the model MLM at  $p < 0.01$ .

| Trait      | Marker  | F        | p        | MarkerR2 |
|------------|---------|----------|----------|----------|
| Carotenoid | RM403   | 7.364    | 0.00772  | 0.0654   |
| SOD        | RM582   | 10.35724 | 0.00169  | 0.09191  |
| SOD        | RM6947  | 7.17785  | 0.0085   | 0.0637   |
| SOD        | RM405   | 12.0128  | 7.52E-04 | 0.10661  |
| SOD        | RM494   | 8.35848  | 0.00462  | 0.07418  |
| SOD        | RM467   | 9.70377  | 0.00234  | 0.08612  |
| TAC        | RM18776 | 10.60926 | 0.00149  | 0.09382  |
| TAC        | RM440   | 9.06064  | 0.00323  | 0.08013  |
| TAC        | RM235   | 9.20935  | 0.003    | 0.08144  |
| TAC        | RM5638  | 11.04573 | 0.0012   | 0.09768  |
| TAC        | RM253   | 10.51261 | 0.00157  | 0.09297  |
| TAC        | RM5626  | 9.35822  | 0.00278  | 0.08276  |
| TAC        | RM5626  | 8.11551  | 0.00523  | 0.07177  |
| GO         | RM340   | 7.44823  | 0.00739  | 0.06508  |
| GO         | RM3701  | 9.33336  | 0.00282  | 0.08155  |
| GO         | RM502   | 8.35407  | 0.00463  | 0.073    |
| GO         | RM3475  | 8.24812  | 0.00489  | 0.07207  |
| GO         | RM209   | 7.44185  | 0.00741  | 0.06503  |
| TFC        | RM3701  | 8.95629  | 0.00341  | 0.07279  |
| TFC        | RM235   | 9.20885  | 0.003    | 0.07484  |
| TFC        | RM494   | 9.64481  | 0.00241  | 0.07839  |
| ABTS       | RM235   | 7.06457  | 0.00902  | 0.06243  |
| ABTS       | RM3701  | 10.97479 | 0.00125  | 0.09699  |

**Supplementary Table 5.** Markers information of the selected 136 SSR markers used for antioxidant content in *indica* rice

| SL No | PR Name | Ch No | Position (Mb) | Forward                   | Reverse                   | Repeat motif     | AT |
|-------|---------|-------|---------------|---------------------------|---------------------------|------------------|----|
| 1     | RM5310  | 1     | 41197253      | TAGACAAAGCAACGGGTTCC      | CGGAAGCAGGAGAATCGTAG      | (TC)12           | 55 |
| 2     | RM582   | 1     | 9190478       | TCTGTTGCCGATTTGTTTCG      | AAATGGCTTACCTGCTGTCTC     | (TC)20           | 55 |
| 3     | RM13335 | 2     | 19213952      | TATGCCAAGAGGAATCCTGAAGC   | GCACTCACACTGATCTGGACAGG   | (GT)10           | 55 |
| 4     | RM6275  | 2     | 7273421       | CACTGAGCCCTTTTGTCTC       | TCCCAGATCAGAATCGAAGG      | (CTG)8           | 50 |
| 5     | RM50    | 6     | 6300000       | ACTGTACCGGTCGAAGACG       | AAATTCCACGTCAGCCTCC       | (CTAT)4(CT)15    | 55 |
| 6     | RM85    | 3     | 37200000      | CCAAAGATGAAACCTGGATTG     | GCACAAGGTGAGCAGTCC        | (TGG)5(TCT)12    | 55 |
| 7     | RM222   | 10    | 2600000       | CTTAAATGGGCCACATGCG       | CAAAGCTTCCGGCCAAAAG       | (CT)18           | 55 |
| 8     | RM247   | 12    | 3185384       | TAGTGCCGATCGATGTAACG      | CATATGGTTTTGACAAAGCG      | (CT)16           | 55 |
| 9     | RM328   | 9     | 3,726,000     | CATAGTGGAGTATGCAGCTGC     | CCTTCTCCCAGTCGTATCTG      | (CAT)5           | 55 |
| 10    | RM337   | 8     | 152299        | GTAGGAAAGGAAGGGCAGAG      | CGATAGATAGCTAGATGTGGCC    | (CTT)4-19-(CTT)8 | 55 |
| 11    | RM340   | 6     | 28599181      | GGTAAATGGACAATCCTATGGC    | GACAAATATAAGGGCAGTGTGC    | (CTT)8T3(CTT)14  | 55 |
| 12    | RM470   | 4     | 28,090,431    | TCCTCATCGGCTTCTTCTC       | AGAACCCGTTCTACGTCACG      | (CTT)14          | 55 |
| 13    | RM472   | 1     | 37889084      | CCATGGCCTGAGAGAGAGAG      | AGCTAAATGGCCATACGGTG      | (GA)21           | 55 |
| 14    | RM506   | 8     | 435648-35677  | CGAGCTAACTTCCGTTCTGG      | GCTACTTGGGTAGCTGACCG      | (CT)13           | 55 |
| 15    | RM1812  | 11    | 2405106       | CAGCTAGTGAGCTCCTAGTG      | GCTAACCACCAACTTATTC       | (AT)16           | 55 |
| 16    | RM3701  | 11    | 8100974       | GAGCTAGAGGGAGGAGGTGC      | TTGACTGATAGCCGATTGGG      | (GA)15           | 55 |
| 17    | RM6947  | 12    | 23974120      | ATTAAACGTCCACTGCTGGC      | GCTAGGTTAGTGGTGCAGGG      | (TTC)8           | 55 |
| 18    | RM14978 | 3     | 13880447      | TATCTGCAGGTGCGTGAAATGG    | GCATATAGAGCGAGTAAGCGAGAGG | (TC)10           | 55 |
| 19    | RM18776 | 5     | 21661718      | CTCCAGGAGGGTACAAATTCTGC   | CCATTGGAACATAGCAAGTGATCG  | (GA)13           | 53 |
| 20    | RM22034 | 7     | 26403619      | CCAGTTTATCTTCTGCACCTTCTCG | TCTTTGAGCAGATGGCTAACAAGG  | (ATTA)5          | 53 |
| 21    | RM24161 | 9     | 12311985      | GTATGGCGAGACCCTACAGACC    | GACCCACTTAATGTGTCACAAGG   | (TATT)5          | 54 |
| 22    | RM223   | 8     | 20650060      | GAGTGAGCTTGGGCTGAAAC      | GAAGGCAAGTCTTGGCACTG      | (CT)25           | 55 |
| 23    | RM440   | 5     | 19912517      | CATGCAACAACGTCACCTTC      | ATGGTTGGTAGGCACCAAAG      | (CTT)22          | 55 |
| 24    | RM201   | 9     | 20174289      | CTCGTTTATTACCTACAGTACC    | CTACCTCCTTTCTAGACCGATA    | (CT)17           | 55 |
| 25    | RM216   | 10    | 5,352,766     | GCATGGCCGATGGTAAAG        | TGTATAAAACCACACGGCCA      | (CT)18           | 55 |
| 26    | RM258   | 10    | 18014265      | TGCTGTATGTAGCTCGCACC      | TGGCCTTTAAAGCTGTGCG       | (GA)21(GGA)3     | 55 |
| 27    | RM286   | 11    | 383711        | GGCTTCATCTTTGGCGAC        | CCGGATTACAGATAAACTC       | (GA)16           | 55 |

|    |                |    |            |                          |                            |                    |    |
|----|----------------|----|------------|--------------------------|----------------------------|--------------------|----|
| 28 | <b>RM3735</b>  | 4  | 26210755   | GCGACCGATCAGCTAGCTAG     | ATAACTCCTCCCTTGCTGCC       | (GA)16             | 55 |
| 29 | <b>RM1347</b>  | 2  | 5314190    | AACAAATTAAACTGCCAAG      | GTCTTATCATCAGAACTGGA       | (AG)23             | 55 |
| 30 | <b>RM7571</b>  | 7  | 10369821   | CCTTATGCCCCCTTCTTAC      | TCGTCTCATGGAGCCACC         | (TCTA)6            | 61 |
| 31 | <b>RM14723</b> | 3  | 9,223,269  | GCAAAGTCCTTTGGACAGGTAGC  | CGTCCCAGATCAAAGTACACTCTTCC | (GA)29             | 54 |
| 32 | <b>RM103</b>   | 6  | 30889151   | CTTCCAATTCAGGCCGGCTGGC   | CGCCACAGCTGACCATGCATGC     | (GAA)5             | 55 |
| 33 | <b>RM315</b>   | 1  | 36734135   | GAGGTACTTCTCCGTTTCAC     | AGTCAGCTCACTGTGCAGTG       | (AT)4(GT)10        | 55 |
| 34 | <b>RM225</b>   | 6  | 3416533    | TGCCCATATGGTCTGGATG      | GAAAGTGGATCAGGAAGGC        | (CT)18             | 55 |
| 35 | <b>RM486</b>   | 1  | 34955554   | CCCCCTCTCTCTCTCTC        | TAGCCACATCAACAGCTTGC       | (CT)14             | 55 |
| 36 | <b>RM256</b>   | 8  | 24270635   | GACAGGGAGTGATTGAAGGC     | GTTGATTTCGCCAAGGGC         | (CT)21             | 55 |
| 37 | <b>RM1113</b>  | 4  | 34085697   | GGGCGCATGTGTATTTCTTC     | TGGGGAAAAACCACAAGCC        | (AG)12             | 55 |
| 38 | <b>RM3423</b>  | 4  | 30,957,747 | AGCAGGCATATAAAGGTGCC     | TGGCCTCAGATTCAGGAAAC       | (CT)18             | 50 |
| 39 | <b>RM6100</b>  | 10 | 18,816,637 | TCCTCTACCAGTACCGCACC     | GCTGGATCACAGATCATTGC       | (CGA)8             | 50 |
| 40 | <b>RM590</b>   | 10 | 23043156   | CATCTCCGCTCTCCATGC       | GGAGTTGGGGTCTTGTCG         | (TCT)10            | 55 |
| 41 | <b>RM5793</b>  | 7  | 17489638   | ACTCTCTTGCGCAACTCTC      | GATAATGCTAGCTGCTGGCC       |                    | 50 |
| 42 | <b>RM405</b>   | 5  | 3073406    | TCACACACTGACAGTCTGAC     | AATGTGGCACGTGAGGTAAG       | (AC)14             | 55 |
| 43 | <b>RM547</b>   | 8  | 5591403    | TAGGTTGGCAGACCTTTTCG     | GTCAAGATCATCTCGTAGCG       | (ATT)19            | 55 |
| 44 | <b>RM7364</b>  | 9  | 9561213    | TTCGTGGATGGAGGGAGTAC     | AGCGTTTGTAGGAGTGCCAC       | (CTAT)9            | 50 |
| 45 | <b>RM205</b>   | 9  | 22720624   | CTGGTTCTGTATGGGAGCAG     | CTGGCCCTTCACGTTTCAGTG      | (CT)25             | 55 |
| 46 | <b>RM167</b>   | 11 | 4073024    | GATCCAGCGTGAGGAACACGT    | AGTCCGACCACAAGGTGCGTTGTC   | (GA)16             | 53 |
| 47 | <b>RM229</b>   | 11 | 18,407,879 | CACTCACACGAACGACTGAC     | CGCAGGTTCTTGTAATGT         | (TC)11(CT)5C3(CT)5 | 50 |
| 48 | <b>RM20A</b>   | 12 | 970538     | ATCTTGTCCTGCAGGTCAT      | GAAACAGAGGCACATTTTCATTG    | (ATT)14            | 55 |
| 49 | <b>RM235</b>   | 12 | 26107904   | AGAAGCTAGGGCTAACGAAC     | TCACCTGGTCAGCCTCTTTC       | (CT)24             | 55 |
| 50 | <b>RM7003</b>  | 12 | 6775083    | GGCAGACATACAGCTTATAGGC   | TGCAAATGAACCCCTCTAGC       | (AAAC)6            | 50 |
| 51 | <b>RM5436</b>  | 7  | 9074712    | CAAAGGGGGTGTCTCTATG      | GTTGCTCGTCTACATGTGC        |                    | 50 |
| 52 | <b>RM25181</b> | 10 | 8849270    | AAAGAGCTTCCCTAATGGCTTCG  | GAGAGAATGACCTCTCCAAGACC    | (TTC)22            | 55 |
| 53 | <b>RM469</b>   | 6  | 564,135    | AGCTGAACAAGCCCTGAAAG     | GACTTGGGCAGTGTGACATG       | (AG)15             | 55 |
| 54 | <b>RM6547</b>  | 1  | 34693224   | TCCATCCTTCTCCTCTCGTG     | AGCCACCCCATATATAGCC        | (GCT)9             | 50 |
| 55 | <b>RM152</b>   | 8  | 682963     | GAAACCACCACACCTCACCG     | CCGTAGACCTTCTGAAGTAG       | (GGC)10            | 55 |
| 56 | <b>RM148</b>   | 3  | 35835805   | ATACAACATTAGGGATGAGGCTGG | TCCTTAAAGGTGGTGCAATGCGAG   | (TG)12             | 50 |
| 57 | <b>RM421</b>   | 5  | 23976333   | AGCTCAGGTGAAACATCCAC     | ATCCAGAATCCATTGACCCC       | (AGAT)6            | 55 |

|    |                |    |            |                           |                         |                     |    |
|----|----------------|----|------------|---------------------------|-------------------------|---------------------|----|
| 58 | <b>RM2634</b>  | 2  | 20495111   | GATTGAAAATTAGAGTTTGCAC    | TGCCGAGATTTAGTCAACTA    | (AT)31              | 55 |
| 59 | <b>RM248</b>   | 7  | 29,339,845 | TCCTTGTAATCTGGTCCC        | GTAGCCTAGCATGGTGCATG    | (CT)25              | 55 |
| 60 | <b>RM7179</b>  | 6  | 19728535   | CACGTGTCAGCTTAAGAGCG      | TTACATCATAAGCCCCGAGG    | (ATAG)6             | 50 |
| 61 | <b>RM215</b>   | 9  | 21189110   | CAAAATGGAGCAGCAAGAGC      | TGAGCACCTCCTTCTCTGTAG   | (CT)16              | 55 |
| 62 | <b>RM324</b>   | 2  | 11389704   | CTGATTCCACACACTTGTGC      | GATTCCACGTCAGGATCTTC    | (CAT)21             | 55 |
| 63 | <b>RM317</b>   | 4  | 29060978   | CATACTTACCAGTTCACCGCC     | CTGGAGAGTGTGAGCTAGTTGA  | (GC)4(GT)18         | 55 |
| 64 | <b>RM174</b>   | 2  | 7006085    | AGCGACGCCAAGACAAGTCGGG    | TCCACGTCGATCGACACGACGG  | (AGG)7(GA)10        | 67 |
| 65 | <b>RM556</b>   | 8  | 22339816   | ACTCCAAACCTCACTGCACC      | TAGCACACTGAACAGCTGGC    | (CCAG)6             | 55 |
| 66 | <b>RM257</b>   | 9  | 17719660   | CAGTTCCGAGCAAGAGTACTC     | GGATCGGACGTGGCATATG     | (CT)24              | 55 |
| 67 | <b>RM502</b>   | 8  | 26492117   | GCGATCGATGGCTACGAC        | ACAACCCAAACAAGAAGGACG   | (TG)10              | 55 |
| 68 | <b>RM331</b>   | 8  | 12294124   | GAACCAGAGGACAAAAATGC      | CATCATACATTTGCAGCCAG    | [(CTT)4GTT]2(CTT)11 | 55 |
| 69 | <b>RM403</b>   | 1  | 29384585   | GCTGTGCATGCAAGTTCATG      | ATGGTCCTCATGTTTCATGGC   | (GA)8               | 55 |
| 70 | <b>RM309</b>   | 12 | 21454591   | GTAGATCACGCACCTTCTGG      | AGAAGGCCTCCGGTGAAG      | (GT)13              | 55 |
| 71 | <b>RM6641</b>  | 2  | 4633966    | GGGTCTCGATTCTCAGTTGG      | CAGAACCACTCATGCACACC    | (GTA)14             | 55 |
| 72 | <b>RM3</b>     | 6  | 19499320   | ACACTGTAGCGGCCACTG        | CCTCCACTGCTCCACATCTT    | (GA)2GG(GA)25       | 55 |
| 73 | <b>RM594</b>   | 1  | 15158295   | GCCACCAAGTAAAGCAATAC      | TTGATCTGCTAGTGAGACCC    | (GA)n               | 55 |
| 74 | <b>RM3392</b>  | 3  | 3825907    | GTCCAATGATTCGTTCCAC       | CTTCACCGTTCACCAATTCC    | (CT)17              | 55 |
| 75 | <b>RM1278</b>  | 3  | 4561347    | ATATAAAGGTGGCAGCAGAG      | GCACTTGAAGTCTAATTCTCC   | (AG)17              | 55 |
| 76 | <b>RM168</b>   | 3  | 28091534   | TGCTGCTTGCCTGCTTCTTT      | GAAACGAATCAATCCACGGC    | T15(GT)14           | 50 |
| 77 | <b>RM3375</b>  | 1  | 18729953   | TTGACCTCCTCCTCCACAAC      | TTGCAAGGAACTAGGAGGG     | (CT)16              | 55 |
| 78 | <b>RM282</b>   | 3  | 12407382   | CTGTGTGCAAGGCTGCAC        | CAGTCCTGTGTTGCAGCAAG    | (GA)15              | 55 |
| 79 | <b>RM26632</b> | 11 | 14702841   | CCAATCACAACCCTCCATCACC    | CCAAAGAGCAACATTGGTTGTGC | (TCTT)9             | 50 |
| 80 | <b>RM1341</b>  | 11 | 19677083   | AACCTGGAGGTGCTGGTCTC      | TTTCTCCCCCAACCAC        |                     | 50 |
| 81 | <b>RM4112</b>  | 11 | 24646850   | TGGCAAAGTCAGTAGTCTTCCACAA | GCCATTCACCAACAGCTCC     | (TA)14              | 55 |
| 82 | <b>RM20377</b> | 6  | 24,320,992 | GTGTGTGATGTGCATGTTTCTGC   | CATGTGATGCCCTGTAGGAACC  | (CT)33              | 50 |
| 83 | <b>RM210</b>   | 8  | 22471837   | TCACATTCGGTGGCATTG        | CGAGGATGGTTGTTCACTTG    | (CT)23              | 55 |
| 84 | <b>RM218</b>   | 3  | 8405368    | TGGTCAAACCAAGGTCCTTC      | GACATACATTCTACCCCCGG    | (TC)24ACT5(GT)11    | 55 |
| 85 | <b>RM494</b>   | 6  | 31088146   | GGGAGGGGATCGAGATAGAC      | TTTAACCTTCTTCCGCTCC     | (AGA)16             | 55 |
| 86 | <b>RM336</b>   | 7  | 21,871,205 | CTTACAGAGAAACGGCATCG      | GCTGGTTTGTTCAGGTTTCG    | (CTT)18             | 55 |
| 87 | <b>RM3475</b>  | 1  | 26041024   | GTCGGTTTGCCTAGTTGAGC      | TTCCTCGGTGTATGGGTCTC    | (CT)22              | 55 |

|     |                |    |                |                         |                          |             |    |
|-----|----------------|----|----------------|-------------------------|--------------------------|-------------|----|
| 88  | <b>RM480</b>   | 5  | 27,313,250     | GCTCAAGCATTCTGCAGTTG    | GCGCTTCTGCTTATTGGAAG     | (AC)30      | 55 |
| 89  | <b>RM566</b>   | 8  | 14704764       | ACCCAACACGATCAGCTCG     | CTCCAGGAACACGCTCTTTC     | (CCAG)6     | 55 |
| 90  | <b>RM11701</b> | 1  | 32026621       | CTGGTGAGTTGCAGTGCCTTAGC | CCTTGCTGCTTCTCATTGAACTGG | (CT)18      | 56 |
| 91  | <b>RM220</b>   | 1  | 4424392        | GGAAGGTAAGTGTTCACAC     | GAAATGCTTCCACATGTCT      | (CT)17      | 55 |
| 92  | <b>RM488</b>   | 1  | 24807508       | CAGCTAGGGTTTTGAGGCTG    | TAGCAACAACCAGCGTATGC     | (GA)17      | 55 |
| 93  | <b>RM6374</b>  | 2  | 15181966       | TGAGGACGCTGATTGTCAAC    | GCTGCCCCTATTATTTACC      | (GAA)16     | 55 |
| 94  | <b>RM233</b>   | 2  | 2069848        | CCAAATGAACCTACATGTTG    | GCATTGCAGACAGCTATTGA     | (CT)20      | 55 |
| 95  | <b>RM112</b>   | 2  | 32013785       | GGGAGGAGAGGCAAGCGGAGAG  | AGCCGGTGCAGTGGACGGTGAC   | (GAA)5      | 55 |
| 96  | <b>RM13600</b> | 2  | 24246249       | GGTTAACCTTTCTCGCTCTTTGG | ATGATCCAAACCCACTGTCTTCC  | (AG)11      | 50 |
| 97  | <b>RM495</b>   | 1  | 215956         | AATCCAAGGTGCAGAGATGG    | CAACGATGACGAACACAACC     | (CTG)7      | 55 |
| 98  | <b>RM493</b>   | 1  | 12280117       | TAGCTCCAACAGGATCGACC    | GTACGTAAACGCGGAAGGTG     | (CTT)9      | 55 |
| 99  | <b>RM444</b>   | 9  | 5925016        | GCTCCACCTGCTTAAGCATC    | TGAAGACCATGTTCTGCAGG     | (AT)12      | 55 |
| 100 | <b>RM468</b>   | 3  | 32674852       | CCCTTCCTTGTTGTGGCTAC    | TGATTTCTGAGAGCCAACCC     | (TAT)8      | 55 |
| 101 | <b>RM6054</b>  | 5  | 22779263       | CCCTCCGTACGGATACACAC    | CTCTTCGGCTTCATCTCCTC     | (CCG)12     | 55 |
| 102 | <b>RM509</b>   | 5  | 16324561       | TAGTGAGGGAGTGGAACGG     | ATCGTCCCCACAATCTCATC     | (TC)11      | 55 |
| 103 | <b>RM5638</b>  | 1  | 20934810       | GGCTTCCTCATCGCCATC      | CTGAGCAGCATTCAGTCTG      | (AAG)13     | 55 |
| 104 | <b>RM8044</b>  | 7  | 24,195,172     | AGTACTTGCTCCTTAGCAG     | CAATATTCACTCAACTCTCA     | (CTT)18     | 55 |
| 105 | <b>RM8271</b>  | 8  | 7616956-617315 | TCTTGAGAAATCTGCCATTC    | ACTGATGTGCATTTCGTC       | (AG)32      | 55 |
| 106 | <b>RM171</b>   | 10 | 19048795       | AACGCGAGGACACGTACTTAC   | ACGAGATACGTACGCCTTTG     | (GATG)5     | 55 |
| 107 | <b>RM16686</b> | 4  | 14718643       | GGCACTGCTTGCATATGGATCG  | TGCCGGCGAACTTATCCTCTCC   | (GGA)10     | 53 |
| 108 | <b>RM434</b>   | 9  | 15662573       | GCCTCATCCCTCTAACCTC     | CAAGAAAGATCAGTGCCTGG     | (TC)12      | 55 |
| 109 | <b>RM6091</b>  | 11 | 13405326       | GCTGTCTGTCTTGAATCC      | TGGTAGGCTGGTGACATGC      | (CCT)11     | 50 |
| 110 | <b>RM209</b>   | 11 | 17808335       | ATATGAGTTGCTGTCTGCG     | CAACTTGCATCCTCCCCTCC     | (CT)18      | 55 |
| 111 | <b>RM245</b>   | 9  | 22300000       | ATGCCGCCAGTGAATAGC      | CTGAGAATCCAATTATCTGGGG   | (CT)14      | 55 |
| 112 | <b>RM1089</b>  | 5  | 5356127        | CAGAAGGATTATCTCGATACC   | AATAGGGCTTGAAATAAATTG    | (AC)33      | 55 |
| 113 | <b>RM228</b>   | 10 | 22243157       | CTGGCCATTAGTCCTTGG      | GCTTGCGGCTCTGCTTAC       | (CA)6(GA)36 | 55 |
| 114 | <b>RM401</b>   | 4  | 13154172       | TGGAACAGATAGGGTGTAAGGG  | CCGTTCAACAACATAACAAGC    | (CT)15      | 55 |
| 115 | <b>RM11</b>    | 7  | 19256914       | TCTCTCTTCCCCGATC        | ATAGCGGGCGAGGCTTAG       | (GA)17      | 55 |
| 116 | <b>RM3351</b>  | 5  | 20696671       | ATGGAAGGAATGGAGGTGAG    | TACCCCTACGTCGATCGATC     | (CT)15      | 55 |
| 117 | <b>RM5749</b>  | 4  | 19950587       | GTGACCACATCTATATCGCTCG  | ATGGCAAGGTTGGATCAGTC     | (ACT)8      | 55 |

|     |               |    |          |                         |                              |                 |    |
|-----|---------------|----|----------|-------------------------|------------------------------|-----------------|----|
| 118 | <b>RM335</b>  | 4  | 688353   | GTACACACCCACATCGAGAAG   | GCTCTATGCGAGTATCCATGG        | (CTT)25         | 55 |
| 119 | <b>RM144</b>  | 11 | 28281693 | TGCCCTGGCGCAAATTTGATCC  | GCTAGAGGAGATCAGATGGTAGTGCATG | (ATT)11         | 55 |
| 120 | <b>RM300</b>  | 2  | 13191380 | GCTTAAGGACTTCTGCGAACC   | CAACAGCGATCCACATCATC         | (GTT)14         | 55 |
| 121 | <b>RM1132</b> | 7  | 23984489 | ATCACCTGAGAAACATCCGG    | CTCCTCCCACGTCAAGGTC          | (AG)12          | 55 |
| 122 | <b>RM400</b>  | 6  | 28431560 | ACACCAGGCTACCCAAACTC    | CGGAGAGATCTGACATGTGG         | (ATA)63         | 55 |
| 123 | <b>RM471</b>  | 4  | 18824746 | ACGCACAAGCAGATGATGAG    | GGGAGAAGACGAATGTTTGC         | (GA)12          | 55 |
| 124 | <b>RM243</b>  | 1  | 7970722  | GATCTGCAGACTGCAGTTGC    | AGCTGCAACGATGTTGTCC          | (CT)18          | 55 |
| 125 | <b>RM467</b>  | 10 | 13488471 | GGTCTCTCTCTCTCTCTCTCTC  | CTCCTGACAATTCAACTGCG         | (TC)21          | 55 |
| 126 | <b>RM564</b>  | 3  | 18587434 | CATGGCCTTGTGTATGCATC    | ATGCAGAGGATTGGCTTGAG         | (GT)14          | 55 |
| 127 | <b>RM8007</b> | 7  | 7710329  | AATAGGATGGATCATGGATA    | CATCTCATCAGGAACCTAAC         | (AT)40          | 55 |
| 128 | <b>RM441</b>  | 11 | 6081100  | ACACCAGAGAGAGAGAGAGAGAG | TCTGCAACGGCTGATAGATG         | (AG)13          | 55 |
| 129 | <b>RM518</b>  | 4  | 2030135  | CTCTTCACTCACTCACCATGG   | ATCCATCTGGAGCAAGCAAC         | (TC)15          | 55 |
| 130 | <b>RM253</b>  | 6  | 5425408  | TCCTTCAAGAGTGCAAAACC    | GCATTGTCATGTCTGAAGCC         | (GA)25          | 55 |
| 131 | <b>RM274</b>  | 5  | 26848154 | CCTCGCTTATGAGAGCTTCG    | CTTCTCCATCACTCCCATGG         | (GA)15-7-(CGG)5 | 55 |
| 132 | <b>RM242</b>  | 9  | 18810067 | GGCCAACGTGTGTATGTCTC    | TATATGCCAAGACGGATGGG         | (CT)26          | 55 |
| 133 | <b>RM3231</b> | 8  | 3838134  | AACACGAAGACCGGCCTC      | CAGGTAGGAGCATGAGAGCC         | (CT)12          | 55 |
| 134 | <b>RM5687</b> | 4  | 15742285 | GATCGCTGGCGATTGATC      | GACTTGTGGGGTGGTTTTTG         | (AAT)17         | 50 |
| 135 | <b>RM5626</b> | 3  | 24864350 | GCAGACGAGATGAGATCG      | GTAGAGGATGGGCAGCAG           | (AAG)11         | 55 |
| 136 | <b>RM452</b>  | 2  | 9563257  | CTGATCGAGAGCGTTAAGGG    | GGGATCAAACCACGTTTCTG         | (GTC)9          | 55 |
